# Supplementary material for: Prompt-Orchestrated Large Language Models for Clinical Information Extraction
Source: Research Square preprint supplement (doi:10.21203/rs.3.rs-8560782/v1), 2026-01-16
Supplement: Supplementary file 1 [file 640f31c51a6b6890eca1cb24.pdf]

---

## Supplementary Information

---

### A Extracted Knowledge

Table S1 presents the complete set of variables considered in the information extraction task, grouped by macroarea. For each variable, we report its macroarea, name, the format of the expected output, and a short description of its clinical meaning. The table highlights the heterogeneity of the data: some variables correspond to numerical measures, while several rely on categorical indicators. In addition, open-ended free-text fields (e.g., comorbidities, therapies, hospital) illustrate the unstructured component of the task.

### B Segmentation and Tagging: Pattern-Matching Dictionary

Table S2 summarizes the dictionary adopted for event segmentation, reporting each tag, its corresponding definition, and the list of Italian keywords used for tagging report segments of clinical history.

### C Digital Tumor Board Dashboard

Based on the structured information extracted through the developed NLP system, a digital dashboard was implemented to enable clinicians to easily access and explore the patient's oncological data. The dashboard was designed to support the Gynecology Oncology Tumor Board in their decision-making process by providing a clear and interactive

visualization of the available information. The dashboard was implemented using Palantir Foundry technology [Palantir Technologies, 2025], leveraging the Workshop module to design an intuitive and interactive interface. This solution can be a potential instrument to support clinical workflow, ensuring that extracted information can be directly available for multidisciplinary evaluation during tumor board meetings. In particular, users can access a detailed page about each patient, where all data extracted from the tumor board report are displayed. Anamnestic features are shown in the header of the page. Historical events are presented in a timeline visualization, organized into main macrocategories, while a more detailed timeline, with the extracted variables are listed for each event category. An example of the detail page is shown in Figure S1.

### References

Palantir Technologies. Palantir foundry [software platform], 2025. Available at: <https://www.palantir.com/palantir-foundry/> (accessed October 2025).

Table S1: Feature Extraction Dictionary

| Macroarea           | Variable                     | Format                    | Description                                                        |
|---------------------|------------------------------|---------------------------|--------------------------------------------------------------------|
| Anamnesis           | Comorbidity                  | string (free text)        | List of comorbidities (e.g., diabetes, hypertension)               |
| Anamnesis           | Treatments                   | string (free text)        | List of previous or ongoing therapies                              |
| Anamnesis           | ASA                          | numeric                   | ASA physical status score                                          |
| Anamnesis           | Spontaneous_Abortion         | numeric                   | Number of spontaneous abortions                                    |
| Anamnesis           | Height                       | numeric                   | Height of the patient (cm)                                         |
| Anamnesis           | BMI                          | numeric                   | Body Mass Index                                                    |
| Anamnesis           | Conley                       | numeric                   | Conley score                                                       |
| Anamnesis           | ECOG                         | numeric                   | Clinical performance status score                                  |
| Anamnesis           | Age                          | numeric                   | Patient age                                                        |
| Anamnesis           | G8                           | numeric                   | Geriatric screening tool score                                     |
| Anamnesis           | Pregnancies                  | numeric                   | Total number of pregnancies                                        |
| Anamnesis           | Pregnancy_Interruption       | numeric                   | Number of voluntary interruptions                                  |
| Anamnesis           | Intrauterine_Deaths          | numeric                   | Number of intrauterine deaths                                      |
| Anamnesis           | Menarche                     | numeric                   | Age at menarche                                                    |
| Anamnesis           | Menopause_Age                | numeric                   | Age at menopause                                                   |
| Anamnesis           | Spontaneous_Births           | numeric                   | Number of spontaneous births                                       |
| Anamnesis           | Weight                       | numeric                   | Weight of the patient (kg)                                         |
| Anamnesis           | Uterine_Cavity_Revision      | numeric                   | Number of uterine cavity revisions                                 |
| Anamnesis           | Residence                    | string (free text)        | Patient residence                                                  |
| Anamnesis           | Cesarean_Section             | numeric                   | Number of cesarean sections                                        |
| Anamnesis           | Menopause_Type               | categorical (multi-class) | Type of menopause                                                  |
| Anamnesis           | Last_Menstruation            | numeric                   | Date of last menstruation                                          |
| Anamnesis           | VAS                          | numeric                   | Visual Analog Scale score                                          |
| Surgery             | Cyst                         | categorical (binary)      | Presence of cyst (yes/no)                                          |
| Surgery             | HIPEC                        | categorical (binary)      | HIPEC procedure performed (yes/no)                                 |
| Surgery             | Effusions                    | categorical (binary)      | Presence of effusions (yes/no)                                     |
| Surgery             | PCI                          | numeric                   | Peritoneal Cancer Index                                            |
| Surgery             | PI                           | numeric                   | Predictor index                                                    |
| Surgery             | RT                           | numeric                   | Tumor Residual                                                     |
| Surgery             | Hospital                     | string (free text)        | Hospital/clinical center name                                      |
| Surgery             | Surgery_Type                 | string (free text)        | Type of surgical intervention                                      |
| Surgery             | Peritoneal_Washing           | categorical (binary)      | Peritoneal washing performed (yes/no)                              |
| Current/History MTB | Addendum                     | categorical (binary)      | Presence of addendum (yes/no)                                      |
| Current/History MTB | Trial                        | categorical (binary)      | Enrollment in clinical trial (yes/no)                              |
| Current/History MTB | Chemotherapy                 | categorical (binary)      | Chemotherapy treatment (yes/no)                                    |
| Current/History MTB | Palliative_Care              | categorical (binary)      | Palliative care or best supportive care (yes/no)                   |
| Current/History MTB | Multidisciplinary_Discussion | categorical (binary)      | Multidisciplinary team discussion held (yes/no)                    |
| Current/History MTB | Fup                          | categorical (binary)      | Follow-up or active surveillance (yes/no)                          |
| Current/History MTB | Investigation                | categorical (binary)      | Further investigations required (yes/no)                           |
| Current/History MTB | Surgery                      | categorical (binary)      | Surgical treatment (yes/no)                                        |
| Current/History MTB | Maintenance_Therapy          | categorical (binary)      | Maintenance therapy (yes/no)                                       |
| Current/History MTB | Molecular_Eval               | categorical (binary)      | Molecular and genetic evaluation (yes/no)                          |
| Current/History MTB | Oncogeriatric_Eval           | categorical (binary)      | Oncogeriatric or multispecialist evaluation (yes/no)               |
| Therapy             | Protocols                    | string (free text)        | Therapy protocols                                                  |
| Therapy             | Therapy                      | string (free text)        | Detailed therapy description                                       |
| Imaging             | Adnexa                       | categorical (binary)      | Malignant involvement of the adnexal tract (yes/no)                |
| Imaging             | Extrapelvic Peritoneum       | categorical (binary)      | Malignant involvement of the extrapelvic peritoneum tract (yes/no) |
| Imaging             | Pelvic Peritoneum            | categorical (binary)      | Malignant involvement of the pelvic peritoneum tract (yes/no)      |

Codice Sanitario  
< Patient ID >

Data TB  
04/08/2024

Tipo TB  
Rilettura Imaging

Decisione TB  
Indagini

Medico Referente  
**Dott. Mario Rossi**  
UOC Ginecologia Oncologica

Generalità

Data di nascita  
**08/10/1950**  
Età: **75**

Residenza BMI  
**Roma 19.53**

Comorbidità Terapie

Gynecology History

Diagnosi

**Tumore ovarico**

|             |          |
|-------------|----------|
| Staging     | ECOG     |
| <b>IIIC</b> | <b>0</b> |
| VAS         | G8       |
| -           | -        |
| ASA         | CONLEY   |
| -           | -        |

Profilazione Molecolare

**MSH2+, MSH6+, MLH1+, PMS2+**

Svolta il:  
**13/06/2024**

Team

PARTECIPANTI MEDICI

< List of Clinical Participants >

TB Report

Timeline Paziente

Ultimi 60 giorni

Storico

Surgery

Ven, 12 Luglio 2025  
Gio, 5 Giugno 2025

Imaging

Mar, 15 Luglio 2025  
Lun, 14 Luglio 2025

Tumor Board

Lun, 4 Agosto 2025

Dettagli

**SURGERY** IMAGING TB PROFILAZIONE MOLECOLARE THERAPY BIOMARKERS OTHERS

Venerdì 12 Luglio 2025

**SURGERY**  
Struttura - Policlinico A. Gemelli  
Approccio Chirurgico - laparoscopia  
Dettagli Intervento - ombelico-pubica  
PI - 8  
Sedi PI - [peritoneo diaframmatico, peritoneo parietale, grande omento, piccolo omento, mesi ileali]  
HIPEC - No  
ASCITE - 1  
Impianto - 0

Summary

- Total Events: 5
- Total Surgery: 2
- Total Therapy: 0
- Total Imaging: 1
- Total Biomarkers: 1
- Total MDT: 1

First Event  
**06/06/2025 - Biomarkers**

Last Event  
**04/08/2025 - Tumor Board**

Last Surgery Date  
**12/07/2025**

|               |            |
|---------------|------------|
| Last PI Value | Last RT    |
| <b>8</b>      | <b>0,5</b> |

Figure S1: Digital Tumor Board Dashboard.

Table S2: Pattern-Matching Dictionary

| Tag     | Definition                                                  | Patterns                                   |
|---------|-------------------------------------------------------------|--------------------------------------------|
| SURGERY | Surgery                                                     | laparoscopy, lps, laparotomy, lpt          |
| MTB     | Multidisciplinary<br>Board                                  | Tumor<br>mdt, tb, mtb                      |
| THERAPY | Therapy                                                     | nact                                       |
| IMAGING | Ecography , Tac, Magnetic<br>Resonance, Radiography,<br>PET | ecografia, eco, oppo; tc, tac; rm; rx; pet |
